# Supplementary material for: Effects of Low-Load Blood Flow Restriction Resistance Training on Muscle Strength and Hypertrophy Compared with Traditional Resistance Training in Healthy Adults Older Than 60 Years: Systematic Review and Meta-Analysis
Source: J Clin Med. 2022 Dec 13;11(24):7389. doi: 10.3390/jcm11247389 (PMC9787798; doi:10.3390/jcm11247389)
Supplement: Supplementary file 1 [file jcm-11-07389-s001.zip]

Archive with 6 entries (6 files):
- File S1. Search strategy.pdf
- File S2.  Risk of bias summary and graph.pdf
- File S3. Sensitivity strength High-Load.pdf
- File S4. Sensitivity hypertrophy High-Load.pdf
- File S5. Sensitivity strength Low-Load.pdf
- File S6. Sensitivity hypertrophy Low-Load.pdf
