# Supplementary material for: Effects of Low-Load Blood Flow Restriction Resistance Training on Muscle Strength and Hypertrophy Compared with Traditional Resistance Training in Healthy Adults Older Than 60 Years: Systematic Review and Meta-Analysis
Source: J Clin Med. 2022 Dec 13;11(24):7389. doi: 10.3390/jcm11247389 (PMC9787798; doi:10.3390/jcm11247389)

**File S5.** Sensitivity and publication bias funnel plots for the comparison in muscle strength between low-load blood flow restriction training and low-load resistance training.

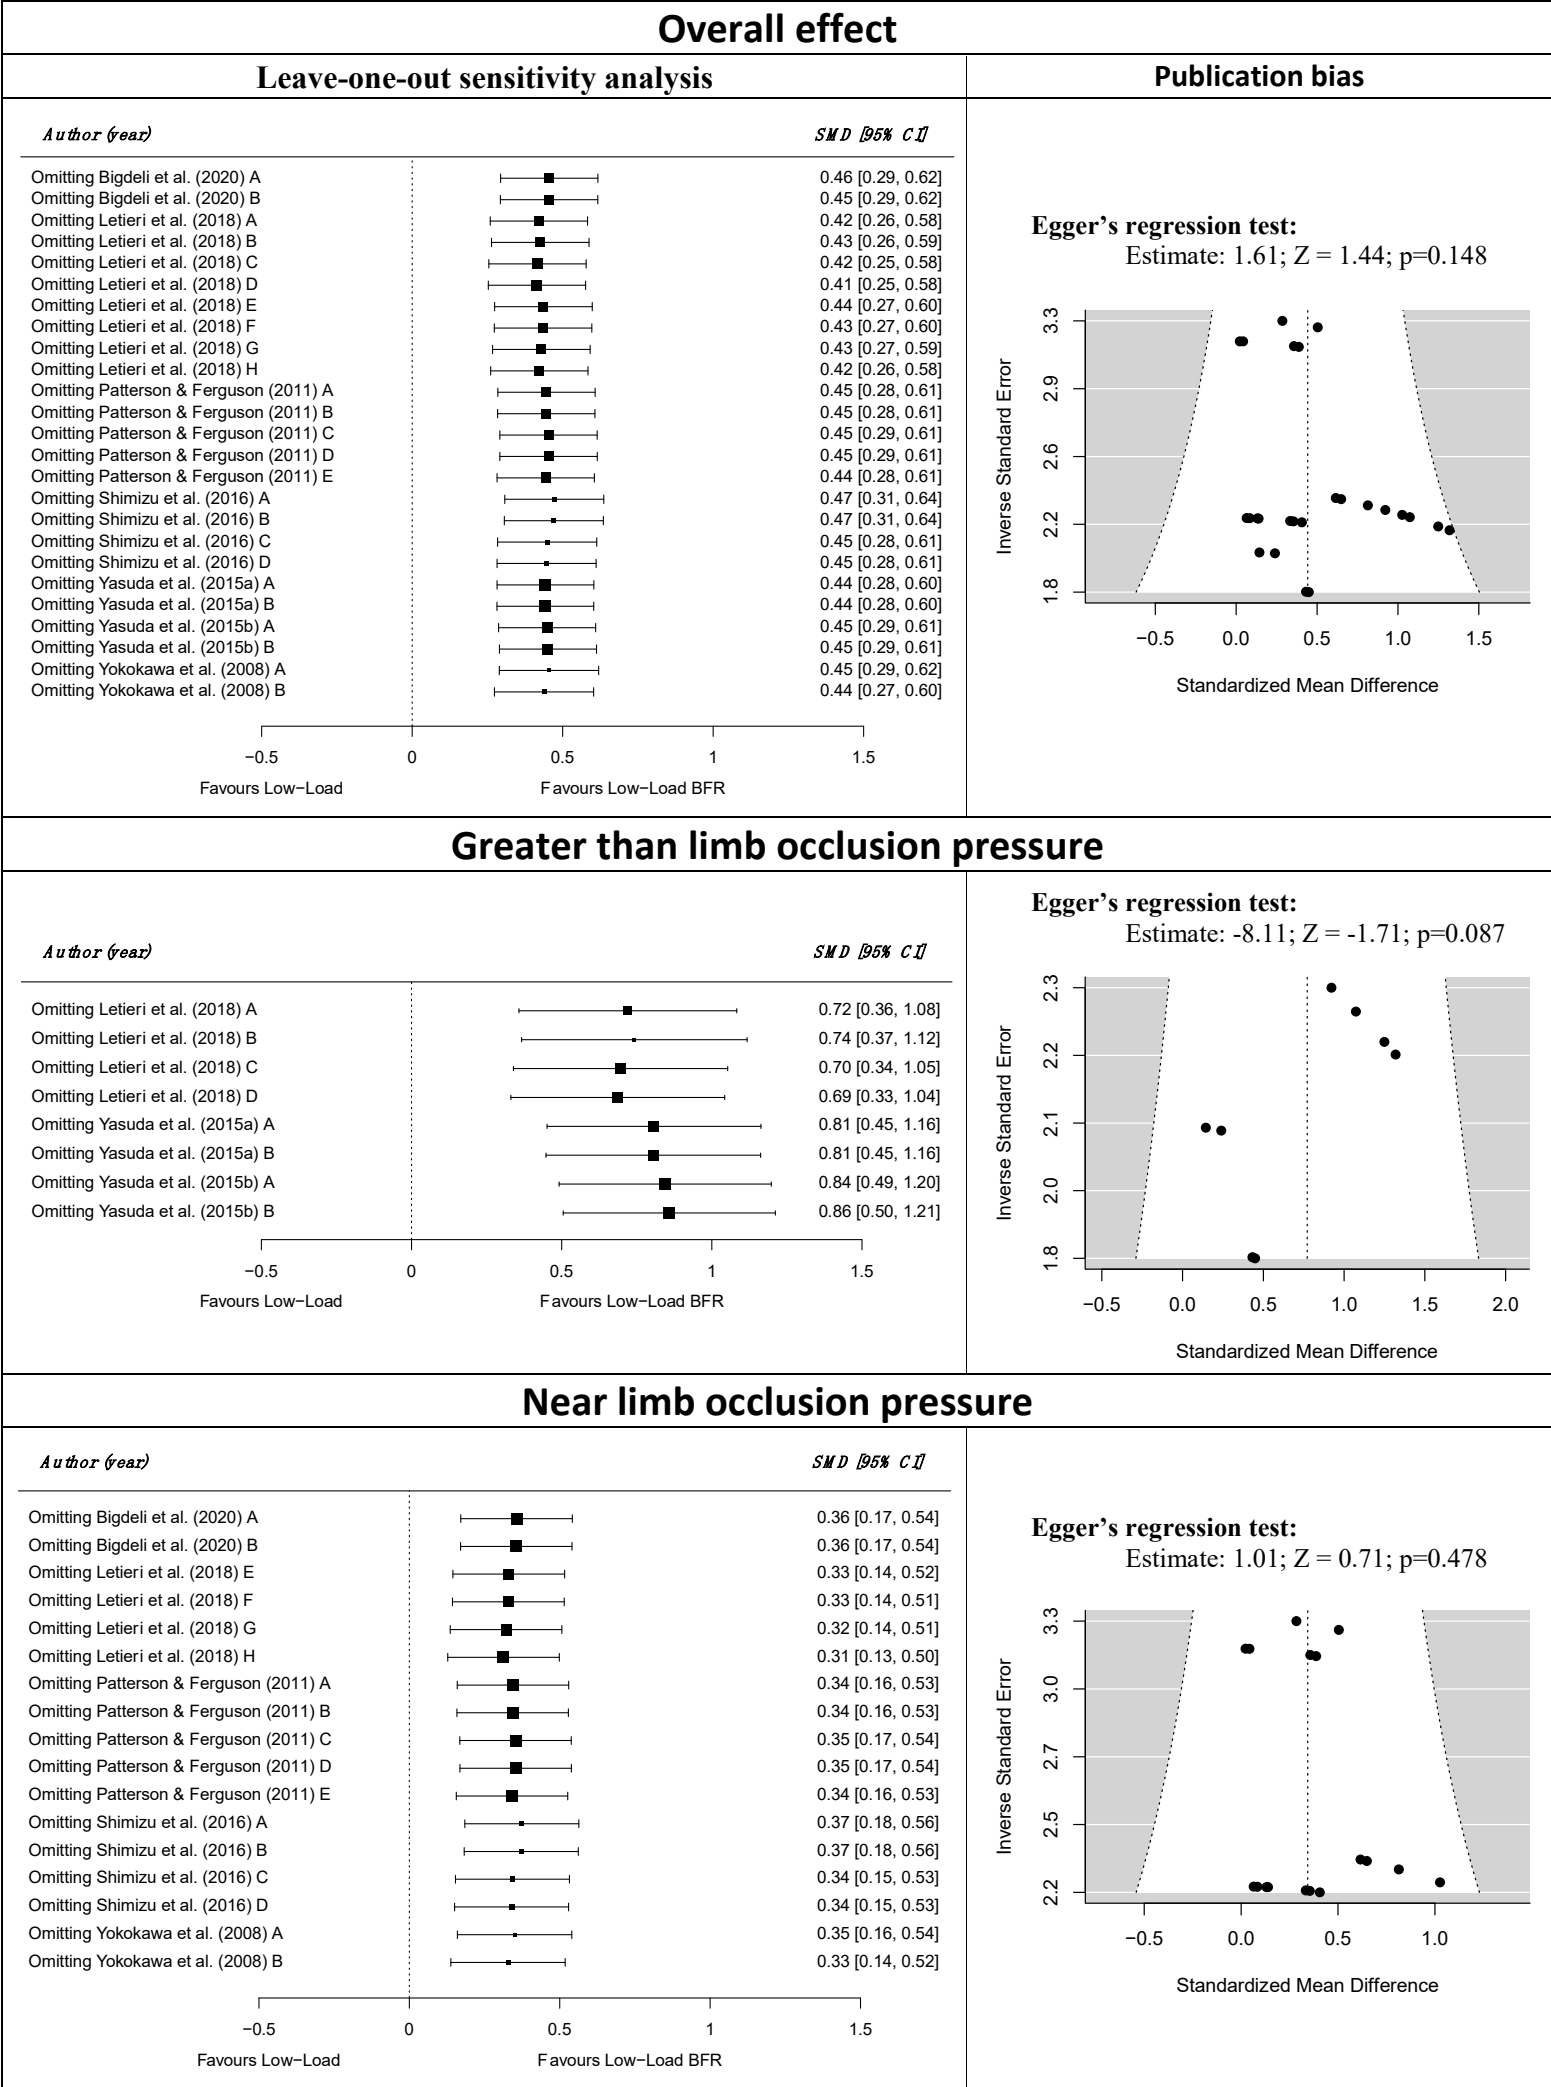

Supplement: Supplementary file 1 [file jcm-11-07389-s001.zip › File S5. Sensitivity strength Low-Load.pdf]
